# Supplementary material for: Prevalence, antibiotic and heavy metal resistance of Vibrio spp. isolated from the clam Meretrix meretrix at different ages in Geligang, Liaohe estuary in China
Source: Frontiers journal article supplement (doi:10.3389/fmars.2022.1071371), 2022-12-20
Supplement: Table_1.DOCX [file Table_1.DOCX]

Supplementary Material

**Supplementary Table 1.** Sequences of PCR primers.

| Target | Primer sequence（5'→3'） | Amplicon size（bp） | References |
| --- | --- | --- | --- |
| *copB* | F: TCCACGTTTGTTCACTGCTC  R: AGTCGGCTGTATTGCCGTAG | 900 | Kamika and Momba, 2013 |
| *copA* | F: TCCATACACTGGCACGGCAT  R: TGGATCGGGTGAGTCATCAT | 1331 | Kamika and Momba, 2013 |
| *copC* | F: TGTTGAACCGCACAAGTTTC  R: GGTAATCGGGTGGGTATCG | 350 | Kamika and Momba, 2013 |
| *nccA* | F: ACGCCGGACATCACGAACAAG  R: CCAGCGCACCGAGACTCATCA | 1141 | Kamika and Momba, 2013 |
| *cadD* | F: AATTGCAAGTTGTGGTGCAG  R: CCCACACCAGGAATTCTAGC | 155 | Yang et al., 2020 |
| *zntA* | F: ATCGTCCGCTCGCTGTATCTCT  R: CCGCCTTTTCCCCTCACCCTAACC | 2374 | Yang et al., 2020 |
| *zntB* | F: TGGTGGAGTAAAACCGCTCG  R: AGCGTAATGAGCGTCCCTTC | 201 | Yang et al., 2020 |
| *ampR* | F: ATTGCCGTGGTCACCATCTG  R: GGCCATTGAGCTGAACGTGA | 870 | Sambrook et al., 2001 |
| *vanM* | F: CGGCAGATTCGTTTACCT  R: TTATCCGTTCTCGCTCCT | 339 | Liu et al., 2014 |
| *tetA* | F: GCTACATCCTGCTTGCCTTC  R: CATAGATCGCCGTGAAGAGG | 210 | Jiang et al., 2014 |
| *tetB* | F: TTGGTTAGGGGCAAGTTTTG  R: GTAATGGGCCAATAACACCG | 659 | Jiang et al., 2014 |
| *tetM* | F: GTRAYGAACTTTACCGAATC  R: ATCGYAGAAGCGGRTCAC | 633 | Jiang et al., 2014 |
| *aadA* | F: GGAGAATGGCAGCGCAAT  R: GTTACTGCGCTGTACCAAT | 269 | Liu et al., 2016 |
| *strA* | F: CCTGGTGATAACGGCAATTC  R: CCAATCGCAGATAGAAGGC | 546 | Jiang et al., 2014 |
| *strB* | F: ATCGTCAAGGGATTGAAACC  R: GGATCGTAGAACATATTGGC | 509 | Jiang et al., 2014 |
| *sul1* | F: GTGACGGTGTTCGGCATTCT  R: TCCGAGAAGGTGATTGCGCT | 779 | Liu et al., 2016 |
| *sul2* | F: CATCATTTTCGGCATCGTC  R: TCTTGCGGTTTCTTTCAGC | 793 | Liu et al., 2016 |
| *blaTEM* | F: ATAAAATTCTTGAAGACGAAA  R: GACAGTTACCAATGCTTAATC | 1086 | Jiang et al., 2014 |
| *blaSHV* | F: GCGAAAGCCAGCTGTCGGGC  R: GATTGGCGGCGCTGTTATCGC | 304 | Jiang et al., 2014 |
| *mecA* | F: TAGAAATGACTGAACGTCCG  R:TTGCGATCAATGTTACCGTAG | 154 | Wu et al., 2019 |
| *ermA* | F: CCCGAAAAATACGCAAAATTTCAT  R: CCCTGTTTACCCATTTATAAACG | 589 | Liu et al., 2016 |
| *ermB* | F: GGGCATTTAACGACGAAACTGG  R: CTGTGGTATGGCGGGTAAGT | 420 | Liu et al., 2016 |
| *ermC* | F: TCAAAACATAATATAGATAAA  R: GCTAATATTGTTTAAATCGTCAAT | 641 | Wu et al., 2019 |
| *qnrS* | F: ACGACATTCGTCAACTGCAA  R: TAAATTGGCACCCTGTAGGC | 417 | Liu et al., 2016 |
| *qyrA* | F: CGATTGGAACAAACCATATAAA  R: CGGTGTAACGCATTGCCGCA | 200 | Jiang et al., 2014 |
| *qnrVC136* | F: TTCTCACATCAGGACTTGC  R: GGAACAATGATTACCCCT | 615 | Liu et al., 2016 |
| *qnrVC457* | F: ATAAAACAGACCAGTTATATGT  R: ACTATTAAACVCTAATTGCTCTA | 630 | Liu et al., 2016 |

**Supplementary** **Table 2.** Alpha diversity index and OTU number of *Meretrix meretrix* samples in different ages.

| Sample | Chao1 | Simpson | Shannon | Goods_coverage | OTU | Shannon/ Simpson |  |
| --- | --- | --- | --- | --- | --- | --- | --- |
| Spr-1age1 | 824.51 | 0.85115 | 5.29081 | 0.998037 | 799 | 6.216072 |  |
| Spr-1age2 | 820.719 | 0.89449 | 4.97059 | 0.997096 | 788 | 5.556898 |  |
| Spr-1age3 | 806.274 | 0.810885 | 3.9543 | 0.995912 | 730 | 4.876524 |  |
| Spr-1age4 | 1043.45 | 0.768052 | 4.15759 | 0.994855 | 974 | 5.413162 |  |
| Spr-2age1 | 755.186 | 0.935557 | 5.35798 | 0.99751 | 721 | 5.727048 |  |
| Spr-2age2 | 806.653 | 0.829085 | 4.33991 | 0.996911 | 764 | 5.234578 |  |
| Spr-2age3 | 495.18 | 0.825262 | 3.82768 | 0.998565 | 481 | 4.638139 |  |
| Spr-2age4 | 671.113 | 0.490031 | 2.70955 | 0.997253 | 626 | 5.529344 |  |
| Sum-1age1 | 374.784 | 0.726113 | 3.11164 | 0.99821 | 344 | 4.285339 |  |
| Sum-1age2 | 761.669 | 0.71949 | 3.83087 | 0.996141 | 699 | 5.324424 |  |
| Sum-2age1 | 867.101 | 0.878849 | 4.59847 | 0.99592 | 807 | 5.232378 |  |
| Sum-2age2 | 641.629 | 0.77542 | 4.0058 | 0.99716 | 595 | 5.165975 |  |
| Sum-5age1 | 239.141 | 0.290632 | 1.44255 | 0.99892 | 224 | 4.963493 |  |
| Sum-5age2 | 1082.18 | 0.91993 | 5.44341 | 0.996617 | 1057 | 5.9172 |  |
| Sum-3age1 | 1230.51 | 0.761146 | 5.07999 | 0.995948 | 1158 | 6.674133 |  |
| Sum-3age2 | 1292.44 | 0.93233 | 6.15213 | 0.995812 | 1238 | 6.598661 |  |
| Sum-3age3 | 1245.84 | 0.953765 | 6.6197 | 0.997425 | 1223 | 6.940599 |  |
| Sum-3age4 | 633.504 | 0.511563 | 2.68459 | 0.997044 | 573 | 5.247819 |  |
| Aut-1age1 | 292.865 | 0.869565 | 4.16111 | 0.999354 | 285 | 4.785278 |  |
| Aut-1age2 | 254.208 | 0.902814 | 4.42476 | 0.999604 | 248 | 4.901076 |  |
| Aut-1age3 | 261.879 | 0.903748 | 4.56176 | 0.99964 | 258 | 5.047602 |  |
| Aut-2age1 | 342.545 | 0.912837 | 4.70532 | 0.999483 | 340 | 5.154611 |  |
| Aut-2age2 | 310.126 | 0.921342 | 4.85323 | 0.999486 | 306 | 5.267566 |  |
| Aut-2age3 | 320.799 | 0.874579 | 4.36675 | 0.999588 | 314 | 4.992974 |  |

**Supplementary Table 3.** Antibiogram of antibiotic-resistant vibrio in *Meretrix petechialis.*

| Antibiotics No. | No. of isolates | Antibiogram |
| --- | --- | --- |
| 1 | 4 | AMP/RD/VA/DA |
| 2 | 10 | AMP-AML/AMP-VA/RD-DA/VA-AK/VA-RD/AK-DA |
| 3 | 8 | AMP-AML-DA/ AMP-SM-AML/ AMP-AML-CFP/VA-RD-DA/VA-AK-DA/ VA-AK-RD/CN-AK-DA |
| 4 | 16 | AMP-AML-AK-DA/ AMP-VA-AML-DA/CN-AK-RD-DA/ AMP-AML-RD-DA/VA-AK-RD-DA/S-AK-RD-DA/ AMP-AML-CFP-DA/VA-CN-AK-DA/AMP-KZ-VA-KF/S-VA-AK-RD |
| 5 | 6 | AMP-AML-KF-RD-DA/ AMP-AML-AK-RD-DA/ AMP-AML-CIP-RD-DA/VA-AK-EM-RD-DA/S-VA-CN-AK-DA/VA-CN-AK-RD-DA |
| 6 | 7 | AMP-VA-AML-AK-RD-DA/ AMP-KZ-VA-AML- RD-DA/ AMP-VA-AML-CIP-RD-DA/ AMP-KZ-AML-KF-RD-DA/ AMP-SM-AML-CXM-AK- DA/SM-VA-CN-AK-RD-DA/AMP-SM-VA-AK-RD-DA |
| 7 | 4 | AMP-KZ-AML-CFP-CIP-RD-DA/ AMP-KZ-AML-KF-CIP-RD-DA/ AMP-SM-AML-CN-AK-RD-DA/AMP-SM-KF-AK-CIP-RD-DA |
| 8 | 4 | AMP-KZ-VA-AML-AK-TE-RD-DA/ AMP-KZ-AML-KF-CFP-AK- RD-DA/ AMP-KZ-VA-AML-CFP-AK- RD-DA/ AMP-KZ-VA-AML-KF-CXM-AK-DA |
| 9 | 1 | AMP-KZ-VA-AML-KF-CXM-CN-AK-DA |
| 10 | 2 | AMP-KZ-SM-VA-AML-KF-CN-AK-RD-DA/ AMP-KZ-VA-AML-KF-CFP-CXM-CN-AK-DA |
| 11 | 2 | AMP-KZ-AML-KF-CFP-CXM -AK-EM-CIP-RD-DA/ AMP-KZ-SM-VA-AML-KF-CXM -CN-AK-RD-DA |
| 12 | 2 | AMP-KZ-SM-VA-AML-KF-CXM -CN-AK-CIP-RD-DA |
| 14 | 1 | AMP-KZ-VA-AML-KF-CFP-CXM-CN-AK-TE-EM-CIP-RD-DA |
| 15 | 1 | AMP-KZ-SM-VA-AML-KF-CFP-CXM-CN-AK-TE-EM-CIP-RD-DA |
|  |  |  |

**Supplementary Table** **4.** MIC value of 3 heavy metal ions of *Vibrio spp.*

| MIC（mg/L） | No. of *Vibrio spp.* | | |
| --- | --- | --- | --- |
|  | Cd2+ | Cu2+ | Zn2+ |
| 25 | 12 | 2 | -- |
| 50 | 16 | 2 | 1 |
| 75 | 34 | 10 | 10 |
| 100 | 7 | 13 | 9 |
| 125 | 4 | 10 | 9 |
| 150 | -- | -- | 2 |
| 175 | -- | 6 | 14 |
| 200 | -- | 8 | 11 |
| 225 | -- | 4 | -- |
| 250 | -- | 7 | 10 |
| 275 | -- | -- | 3 |
| 300 | -- | 1 | 2 |
| 350 | -- | -- | 1 |
| 400 | -- | -- | 1 |

Note: “--”not detected

**Supplementary Table** **5.** Antibiotic and heavy mental resistance gene of *Vibrio* spp. in clam in different ages.

| Resistance genes | No. of isolates（%） | | | | |
| --- | --- | --- | --- | --- | --- |
|  | Total | 1-year-old | 2-year-old | 3-year-old | 5-year-old |
| *copA* | 7（10） | 0 | 3（30） | 3（7） | 1（14） |
| *copB* | 9（12） | 2（20） | 1（10） | 6（13） | 0 |
| *copC* | 4（5） | 1（10） | 1（10） | 2（4） | 0 |
| *nccA* | 10（14） | 2（20） | 1（10） | 6（13） | 1（14） |
| *cadD* | 2（3） | 0 | 1（10） | 1（2） | 0 |
| *zntA* | 0 | 0 | 0 | 0 | 0 |
| *zntB* | 5（7） | 1（10） | 1（10） | 2（4） | 1（14） |
| *ampR* | 4（5） | 1（10） | 2（20） | 1（2） | 0 |
| *aadA* | 10（14） | 1（10） | 1（10） | 8（17） | 0 |
| *strA* | 4（5） | 1（10） | 2（20） | 1（2） | 0 |
| *strB* | 2（3） | 0 | 1（10） | 1（2） | 0 |
| *vanM* | 3（4） | 1（10） | 1（10.00） | 1（2.17） | 0 |
